# Supplementary material for: Fruit and Vegetable Concentrate Supplementation and Cardiovascular Health: A Systematic Review from a Public Health Perspective
Source: PubMed Central journal article supplement (PMC6912365; doi:10.3390/jcm8111914), 2019-11-08
Supplement: jcm-08-01914-s001.pdf [file jcm-08-01914-s001.pdf]

**Table S1.** Search strings and retrieved records. Numbers reported in bold characters are the final references included. Numbers reflect the records that were retrieved until June 22nd, 2018.

| Search string                                                                                                                                                                                                                          | N of records |
|----------------------------------------------------------------------------------------------------------------------------------------------------------------------------------------------------------------------------------------|--------------|
| PubMed                                                                                                                                                                                                                                 |              |
| fruits[MeSH Terms] OR "fruit" OR "fruits"                                                                                                                                                                                              | 146515       |
| vegetables[MeSH Terms] OR "vegetable" OR "vegetables"                                                                                                                                                                                  | 65817        |
| "concentrate" OR "concentrates"                                                                                                                                                                                                        | 42962        |
| ((fruits[MeSH Terms] OR "fruit" OR "fruits") OR (vegetables[MeSH Terms] OR "vegetable" OR "vegetables")) AND ("concentrate" OR "concentrates")                                                                                         | 1285         |
| ((fruits[MeSH Terms] OR "fruit" OR "fruits") OR (vegetables[MeSH Terms] OR "vegetable" OR "vegetables")) AND ("concentrate" OR "concentrates")                                                                                         | <b>310</b>   |
| Scopus                                                                                                                                                                                                                                 |              |
| TITLE-ABS-KEY(fruit) OR TITLE-ABS-KEY(frui <u>t</u> s)                                                                                                                                                                                 | 280395       |
| TITLE-ABS-KEY(vegetable) OR TITLE-ABS-KEY(vegetables)                                                                                                                                                                                  | 196186       |
| ALL(concentrate) OR ALL(concentrates)                                                                                                                                                                                                  | 292282       |
| ((TITLE-ABS-KEY(fruit) OR TITLE-ABS-KEY(frui <u>t</u> s)) OR (TITLE-ABS-KEY(vegetable) OR TITLE-ABS-KEY(vegetables))) AND (ALL(concentrate) OR ALL(concentrates))                                                                      | 9970         |
| ((TITLE-ABS-KEY(fruit) OR TITLE-ABS-KEY(frui <u>t</u> s)) OR (TITLE-ABS-KEY(vegetable) OR TITLE-ABS-KEY(vegetables))) AND (ALL(concentrate) OR ALL(concentrates)) AND (LIMIT-TO(EXACTKEYWORD, "Human") AND LIMIT-TO(SUBJAREA, "MEDI")) | <b>1287</b>  |
| Web of Science                                                                                                                                                                                                                         |              |
| TOPIC: (fruit) OR TOPIC: (frui <u>t</u> s)                                                                                                                                                                                             | 220306       |
| TOPIC: (vegetable) OR TOPIC: (vegetables)                                                                                                                                                                                              | 102998       |
| TOPIC: (concentrate) OR TOPIC: (concentrates)                                                                                                                                                                                          | 276583       |
| ((TOPIC: (fruit) OR TOPIC: (frui <u>t</u> s)) OR (TOPIC: (vegetable) OR TOPIC: (vegetables))) AND (TOPIC: (concentrate) OR TOPIC: (concentrates))                                                                                      | 3959         |
| ((TOPIC: (fruit) OR TOPIC: (frui <u>t</u> s)) OR (TOPIC: (vegetable) OR TOPIC: (vegetables))) AND (TOPIC: (concentrate) OR TOPIC: (concentrates))                                                                                      | <b>232</b>   |
| Embase                                                                                                                                                                                                                                 |              |
| 'fruit'/exp OR 'fruit'                                                                                                                                                                                                                 | 165,734      |
| 'vegetable'/exp OR 'vegetable'                                                                                                                                                                                                         | 204,332      |
| 'concentrate' OR 'concentrates'                                                                                                                                                                                                        | 67,055       |
| (('fruit'/exp OR 'fruit') OR ('vegetable'/exp OR 'vegetable')) AND ('concentrate' OR 'concentrates')                                                                                                                                   | 2,372        |
| (('fruit'/exp OR 'fruit') OR ('vegetable'/exp OR 'vegetable')) AND ('concentrate' OR 'concentrates')                                                                                                                                   | <b>549</b>   |

**Table S2.** Articles used to estimate the effect size of a single concentrate product on a specific clinical surrogate.

| Population                  | Healthy             |                    |                   |                  |                        |     | Metabolic syndrome |                                    |                                    |                 |                                    |     | Hypertension                             |                  |                  |     |                  |                  |               |
|-----------------------------|---------------------|--------------------|-------------------|------------------|------------------------|-----|--------------------|------------------------------------|------------------------------------|-----------------|------------------------------------|-----|------------------------------------------|------------------|------------------|-----|------------------|------------------|---------------|
|                             | Surrogate           | TC                 | LDL               | HCY              | BMI                    | SBP | TNF- $\alpha$      | TC                                 | LDL                                | HCY             | BMI                                | SBP | TNF- $\alpha$                            | TC               | LDL              | HCY | BMI              | SBP              | TNF- $\alpha$ |
| Encapsulated FV concentrate | Novembrino 2011 [1] | Plotnick 2003 [2]  | Panunzio 2003 [3] | -                | -                      | -   | Lamprecht 2007 [4] | Ali 2011 [5]<br>Williams 2017 [6]* | Ali 2011 [5]<br>Williams 2017 [6]* | -               | Ali 2011 [5]<br>Williams 2017 [6]* | -   | Lamprecht 2013 [7]<br>Williams 2017 [6]* | -                | -                | -   | -                | -                | -             |
| Artichoke                   | -                   | -                  | -                 | -                | -                      | -   | -                  | -                                  | -                                  | -               | -                                  | -   | -                                        | Roghani 2009 [8] | Roghani 2009 [8] | -   | Roghani 2009 [8] | Roghani 2009 [8] | -             |
| Jerusalem artichoke         | -                   | -                  | -                 | -                | -                      | -   | Antal 2008 [9]     | Antal 2008 [9]                     | -                                  | -               | -                                  | -   | -                                        | -                | -                | -   | -                | -                | -             |
| Orange juice                | Cesar 2010 [10]     | Cesar 2010 [10]    | -                 | Cesar 2010 [10]  | -                      | -   | Cesar 2010 [10]    | Cesar 2010 [10]                    | -                                  | Cesar 2010 [10] | -                                  | -   | -                                        | -                | -                | -   | -                | -                | -             |
| Fruit and vegetable drink   | George 2012 [11]    | George 2012 [11]   | George 2012 [11]  | George 2012 [11] | George 2012 [11]       | -   | -                  | -                                  | -                                  | -               | -                                  | -   | -                                        | -                | -                | -   | -                | -                | -             |
| Cherry Juice                | Lynn 2014 [12]      | -                  | -                 | -                | Lynn 2014 [12]         | -   | -                  | -                                  | -                                  | -               | -                                  | -   | -                                        | -                | -                | -   | -                | -                | -             |
| Fruit juice                 | Van Berg 2001 [13]  | Den Berg 2001 [13] | -                 | -                | Van Den Berg 2001 [13] | -   | -                  | -                                  | -                                  | -               | -                                  | -   | -                                        | -                | -                | -   | -                | -                | -             |

\*The pooled effect was used for the purpose of the simulation



|                               |            |                             |       |        |        |  |             |            |  |            |  |  |        |  |
|-------------------------------|------------|-----------------------------|-------|--------|--------|--|-------------|------------|--|------------|--|--|--------|--|
| Van Den Berg et al. 2001 [13] | 330 mL     | Fruit juice                 | 1.2 g | 33.3 g | <0.2 g |  | <0.03 mg    | 52.5 mg    |  |            |  |  | 580 KJ |  |
| Williams et al. 2017 [6]      | 6 capsules | Encapsulated FV concentrate |       |        |        |  | 3.05 mg/day | 300 mg/day |  | 350 mg/day |  |  |        |  |

## References

1. Novembrino, C. ;Cighetti, G. ;De Giuseppe, R. ;Vigna, L. ;de Liso, F. ;Pellegatta, M. ;Gregori, D. ;Maiavacca, R. ;Bamonti, F. Effects of encapsulated fruit and vegetable juice powder concentrates on oxidative status in heavy smokers. *J. Am. Coll. Nutr.* **2011**, *30*, 49–56.
2. Plotnick, G.D. ;Corretti, M.C. ;Vogel, R.A. ;Hesslink Jr, R. ;Wise, J.A. Effect of supplemental phytonutrients on impairment of the flow-mediated brachial artery vasoactivity after a single high-fat meal. *J. Am. Coll. Cardiol.* **2003**, *41*, 1744–1749.
3. Panunzio, M.F. ;Pisano, A. ;Antoniciello, A. ;Di Martino, V. ;Frisoli, L. ;Cipriani, V. ;Mongelli, M.A. ;Bronzetti, G. Supplementation with fruit and vegetable concentrate decreases plasma homocysteine levels in a dietary controlled trial. *Nutr. Res.* **2003**, *23*, 1221–1228.
4. Lamprecht, M. ;Oetl, K. ;Schwabberger, G. ;Hofmann, P. ;Greilberger, J.F. Several indicators of oxidative stress, immunity, and illness improved in trained men consuming an encapsulated juice powder concentrate for 28 weeks. *J. Nutr.* **2007**, *137*, 2737–2741.
5. Ali, A. ;Yazaki, Y. ;Njike, V.Y. ;Ma, Y. ;Katz, D.L. Effect of fruit and vegetable concentrates on endothelial function in metabolic syndrome: A randomized controlled trial. *Nutr. J.* **2011**, *10*.
6. Williams, E.J. ;Baines, K.J. ;Berthon, B.S. ;Wood, L.G. Effects of an encapsulated fruit and vegetable juice concentrate on obesity-induced systemic inflammation: A randomised controlled trial. *Nutrients* **2017**, *9*.
7. Lamprecht, M. ;Obermayer, G. ;Steinbauer, K. ;Cvirn, G. ;Hofmann, L. ;Ledinski, G. ;Greilberger, J.F. ;Hallstroem, S. Supplementation with a juice powder concentrate and exercise decrease oxidation and inflammation, and improve the microcirculation in obese women: randomised controlled trial data. *Br. J. Nutr.* **2013**, *110*, 1685–1695.
8. Roghani-Dehkordi, F. ;Kamkhah, A.F. Artichoke leaf juice contains antihypertensive effect in patients with mild hypertension. *J. Diet. Suppl.* **2009**, *6*, 328–341.
9. Antal, M. ;Péter, S. ;Regőly-Mérei, A. ;Biró L. ;Arató G. ;Schmidt, J. ;Nagy, K. ;Greiner, E. ;Lásztity, N. ;Szabó C. Effects of oligofructose containing diet in obese persons. *Clin. Exp. Med. J.* **2010**, *4*, 141–152.
10. Cesar, T.B. ; A., N.P. ; Araujo, M.P. ; Vinagre, C.C. ; Maranhao, R.C. Orange juice decreases low-density lipoprotein cholesterol in hypercholesterolemic subjects and improves lipid transfer to high-density lipoprotein in normal and hypercholesterolemic subjects. *Nutr Res* **2010**, *30*, 689–94.
11. George, T.W. ;Paterson, E. ;Waroonphan, S. ;Gordon, M.H. ;Lovegrove, J.A. Effects of chronic consumption of fruit and vegetable puree-based drinks on vasodilation, plasma oxidative stability and antioxidant status. *J. Hum. Nutr. Diet.* **2012**, *25*, 477–487.
12. Lynn, A. ; Mathew, S. ; Moore, C.T. ; Russell, J. ; Robinson, E. ; Soumpasi, V. ; Barker, M.E. Effect of a Tart Cherry Juice Supplement on Arterial Stiffness and Inflammation in Healthy Adults: A Randomised Controlled Trial. *Plant Foods Hum. Nutr.* **2014**, *69*, 122–127.
13. Van Den Berg, R. ;Van V., T. ;Broekmans, W.M.R. ;Cnubben, N.H.P. ;Vaes, W.H.J. ;Roza, L. ;Haenen, G.R.M.M. ;Bast, A. ;Van Den Berg, H. A vegetable/fruit concentrate with high antioxidant capacity has no effect on biomarkers of antioxidant status in male smokers. *J. Nutr.* **2001**, *131*, 1714–1722.
